# Supplementary material for: Histamine H2 receptor deficit in glutamatergic neurons contributes to the pathogenesis of schizophrenia
Source: PubMed Central journal article supplement — Proc Natl Acad Sci U S A. 2023 Feb 22;120(9):e2207003120. doi: 10.1073/pnas.2207003120 (PMC9992765; doi:10.1073/pnas.2207003120), 2023-02-22
Supplement: pnas.2207003120.sapp.pdf [file pnas.2207003120.sapp.pdf]

## Supplementary Materials for

### **Histamine H<sub>2</sub> receptor deficit in glutamatergic neurons contributes to the pathogenesis of schizophrenia**

Qianyi Ma<sup>a, 1</sup>, Lei Jiang<sup>a, 1</sup>, Han Chen<sup>a</sup>, Dadao An<sup>a</sup>, Yiting Ping<sup>a</sup>, Haibin Dai<sup>a</sup>, Xiangnan Zhang<sup>a</sup>, Yi Wang<sup>a, b</sup>, Zhong Chen<sup>a, b\*</sup>, Weiwei Hu<sup>a\*</sup>

Corresponding to: Professor Zhong Chen ([chenzhong@zju.edu.cn](mailto:chenzhong@zju.edu.cn)) and professor Weiwei Hu ([huww@zju.edu.cn](mailto:huww@zju.edu.cn))

#### **This PDF file includes:**

Fig. S1 to S7  
Tables S1

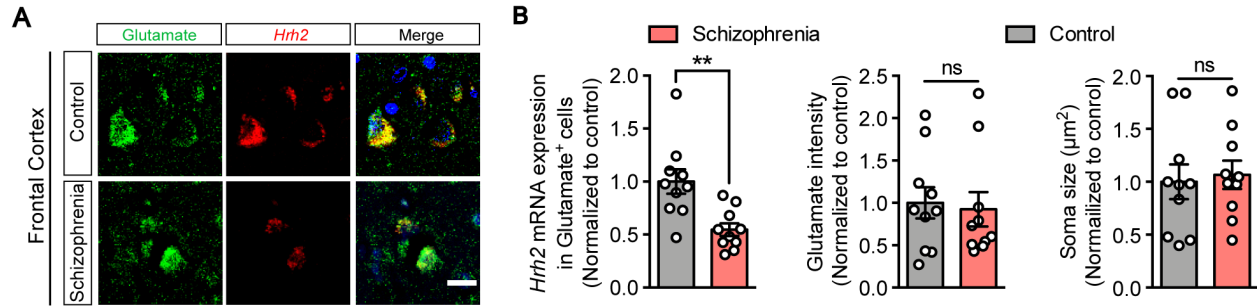

**Fig. S1. Decreased *Hrh2* mRNA level was found in schizophrenia patients. (A)** Representative photographs of RNAscope assay of *Hrh2* mRNA and immunostaining of glutamate in the frontal cortex of schizophrenia patients and controls. Scale bar, 15 µm. **(B)** Quantitative statistics of *Hrh2* mRNA expression in glutamatergic neurons, glutamate intensity and soma size of glutamate<sup>+</sup> neurons in schizophrenia patients and controls. n=10 for each group. \*\* $P \leq 0.01$ . See also Table. S2 for further statistical information.

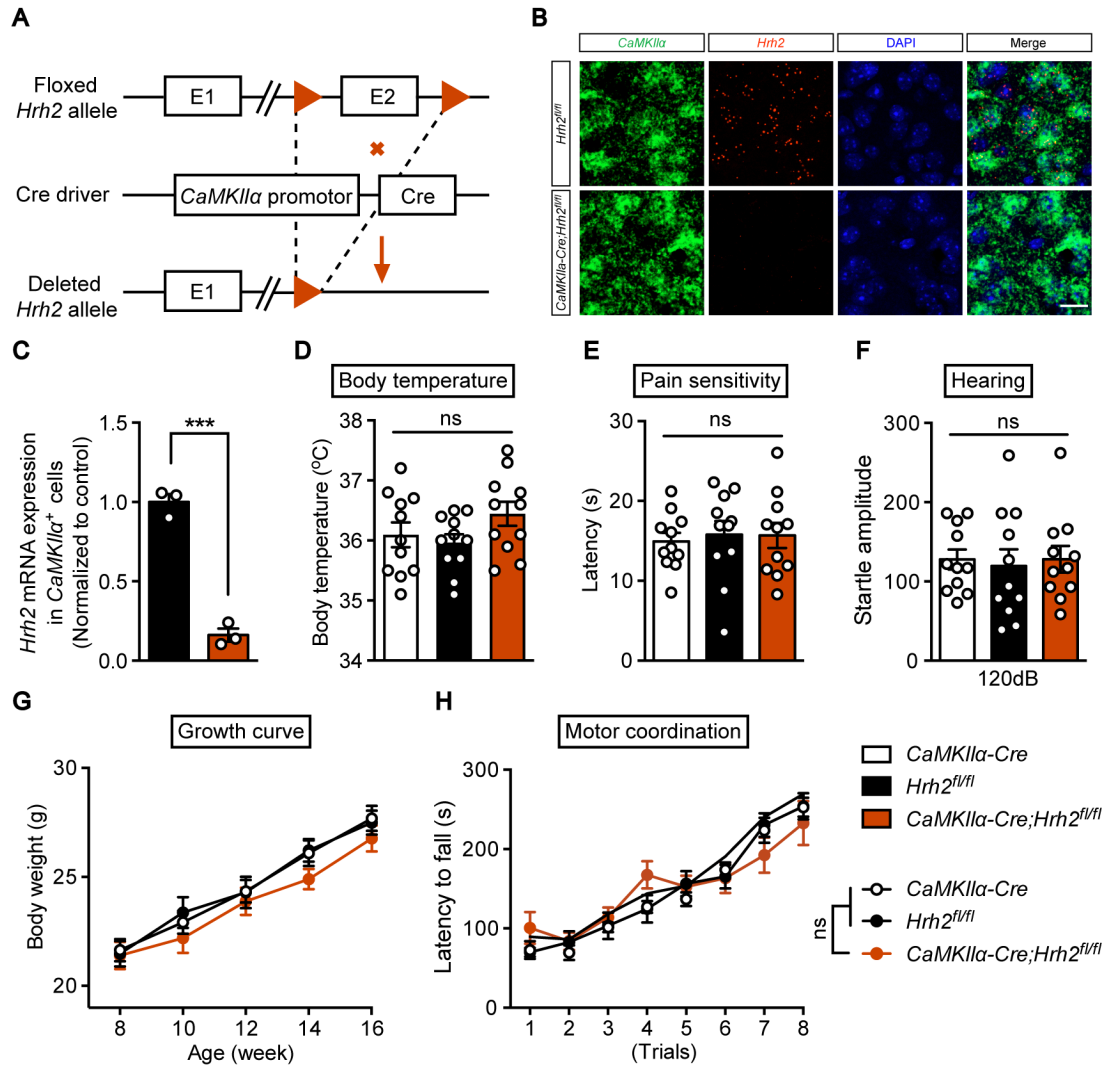

**Fig. S2. Decreased histamine H2R expression in glutamatergic neurons does not impair the physiological functions of mice.** (A) Schematic diagram of the generation of *CaMKIIα-Cre; Hrh2<sup>fl/fl</sup>* mice. (B) Representative images of RNAscope *in situ* hybridization of *Hrh2* and *CaMKIIα* mRNA together with staining of nuclei with DAPI in mPFC. Scale bar, 20  $\mu$ m. (C) *Hrh2* mRNA expression in *CaMKIIα<sup>+</sup>* neurons. (D-H) Body temperature, pain sensitivity, hearing, weight, and motor coordination function in *CaMKIIα-Cre*, *Hrh2<sup>fl/fl</sup>*, and *CaMKIIα-Cre; Hrh2<sup>fl/fl</sup>* mice. (D) The body temperature of each mouse assessed by a rectal thermometer. (E) Pain sensitivity measured by a hot plate test. (F) Analysis of the auditory startle reflex under 120 dB to test the hearing of mice. (G) Growth curve from 8 to 16 weeks of age. (H) Motor coordination function assessed by the accelerated rotarod test. n=11 mice per group. \*\*\* $P \leq 0.001$ , ns, not significant. See also Table. S2 for further statistical information.

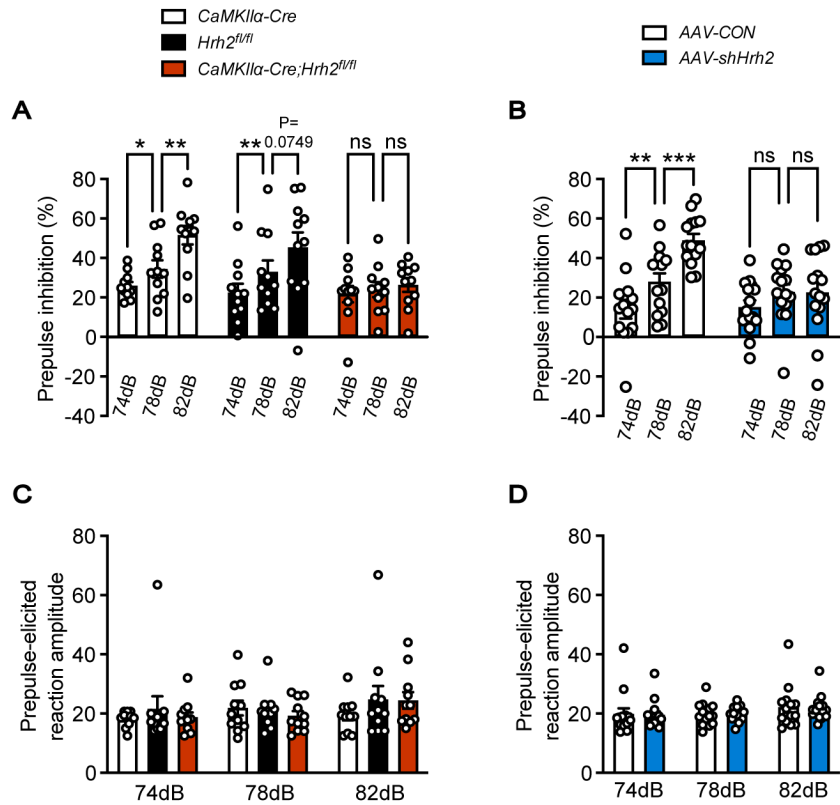

**Fig. S3. Sensorimotor gating ability and prepulse-elicited reaction in H2R knockout or knockdown mice.** (A-B) Sensorimotor gating ability of mice re-analysed from fig. 1A and fig. 2B. (C-D) Prepulse-elicited reaction in H2R knockout or knockdown mice.  $n=11$  *Hrh2<sup>fl/fl</sup>*, *CaMKIIα-Cre* and *CaMKIIα-Cre; Hrh2<sup>fl/fl</sup>* mice; 13 *CaMKIIα-Cre*+AAV-CON mice and 14 *CaMKIIα-Cre*+AAV-shHrh2 mice. \* $P \leq 0.05$ , \*\* $P \leq 0.01$ , \*\*\* $P \leq 0.001$ . ns, not significant. See also Table. S2 for further statistical information.

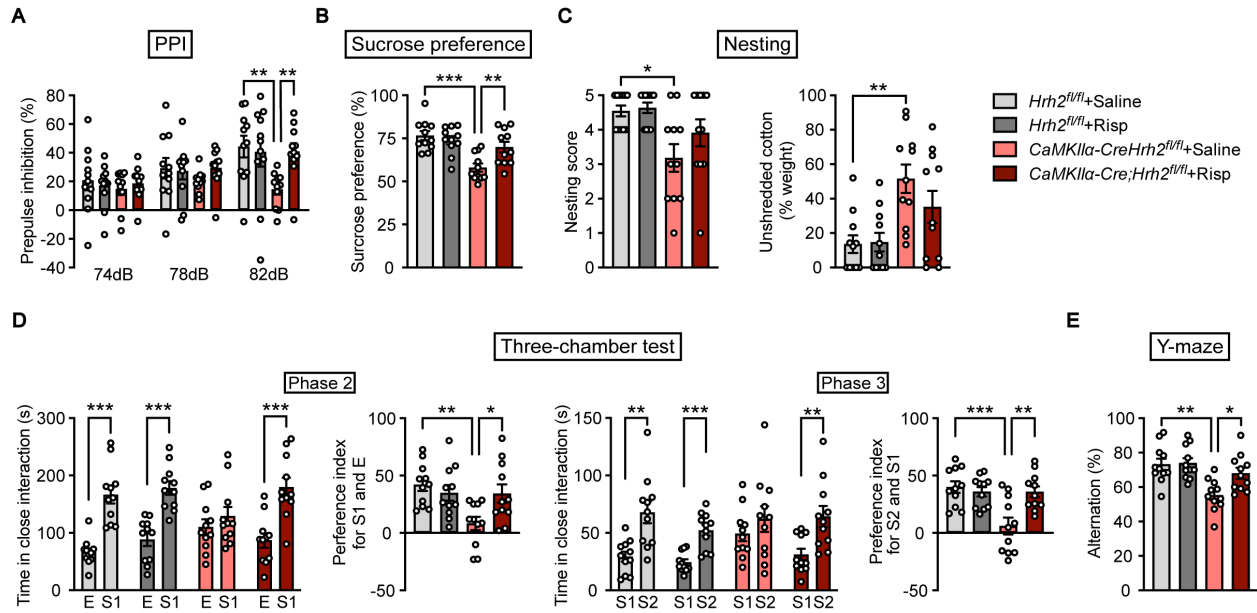

**Fig. S4. Antipsychotic agent risperidone rescues sensorimotor gating ability deficit, anhedonia-like behavior and social indifference manifested in *CaMKIIα-Cre; Hrh2<sup>fl/fl</sup>* mice.** (A-E) Sensorimotor gating, hedonic function, social behavior and cognitive behavior in *Hrh2<sup>fl/fl</sup>* and *CaMKIIα-Cre; Hrh2<sup>fl/fl</sup>* mice treated with saline or risperidone. (A) Percentage of PPI of the auditory startle reflex under 74, 78, 82 dB prepulse intensities. (B) Test for sucrose preference within a 48 h period. (C) Nesting score and percentage of unshredded cotton in nest-building test. (D) Time in close interaction and preference index during phase 2 and phase 3 in three-chamber test. (E) Percentage of correct choice in Y-maze test. n=11 mice per group. \* $P \leq 0.05$ , \*\* $P \leq 0.01$ , \*\*\* $P \leq 0.001$ . See also Table. S2 for further statistical information.

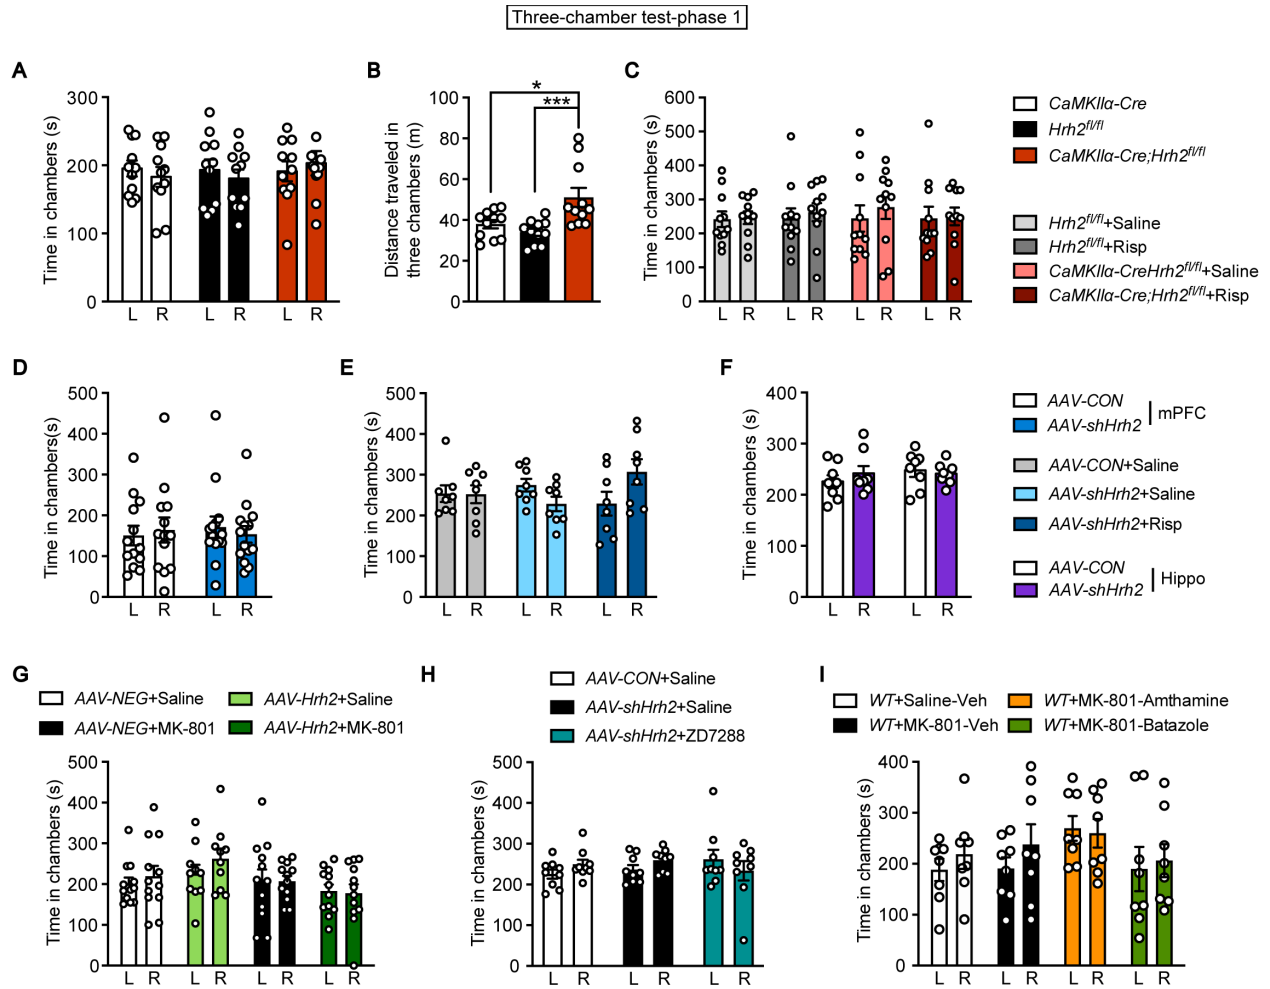

**Fig. S5. Behavioral data for phase 1 in the three-chamber test.** (A) Time in the left or right chamber and (B) total distance traveled during phase 1 for *Hrh2<sup>fl/fl</sup>*, *CaMKII $\alpha$ -Cre*, and *CaMKII $\alpha$ -Cre; Hrh2<sup>fl/fl</sup>* mice. (C-I) Time in the left or right chamber during phase 1. (C) *Hrh2<sup>fl/fl</sup>* and *CaMKII $\alpha$ -Cre; Hrh2<sup>fl/fl</sup>* mice treated with risperidone, (D) *CaMKII $\alpha$ -Cre* mice injected in the mPFC with AAV-FLEX-scramble *shRNA-GFP* (AAV-CON) or AAV-FLEX-*shHrh2-GFP* (AAV-*shHrh2*) and (E) treated with risperidone, (F) *CaMKII $\alpha$ -Cre* mice injected in the hippocampus with AAV-CON or AAV-*shHrh2*, (G) *CaMKII $\alpha$ -Cre* mice injected in the mPFC with AAV-NEG or AAV-*Hrh2*, (H) *CaMKII $\alpha$ -Cre* mice injected in the mPFC with AAV-CON or AAV-*shHrh2* treated with ZD7288 and (I) wild-type (WT) mice treated with saline, amthamine, or batazole after chronic exposure to MK-801. See also Table. S2 for further statistical information.

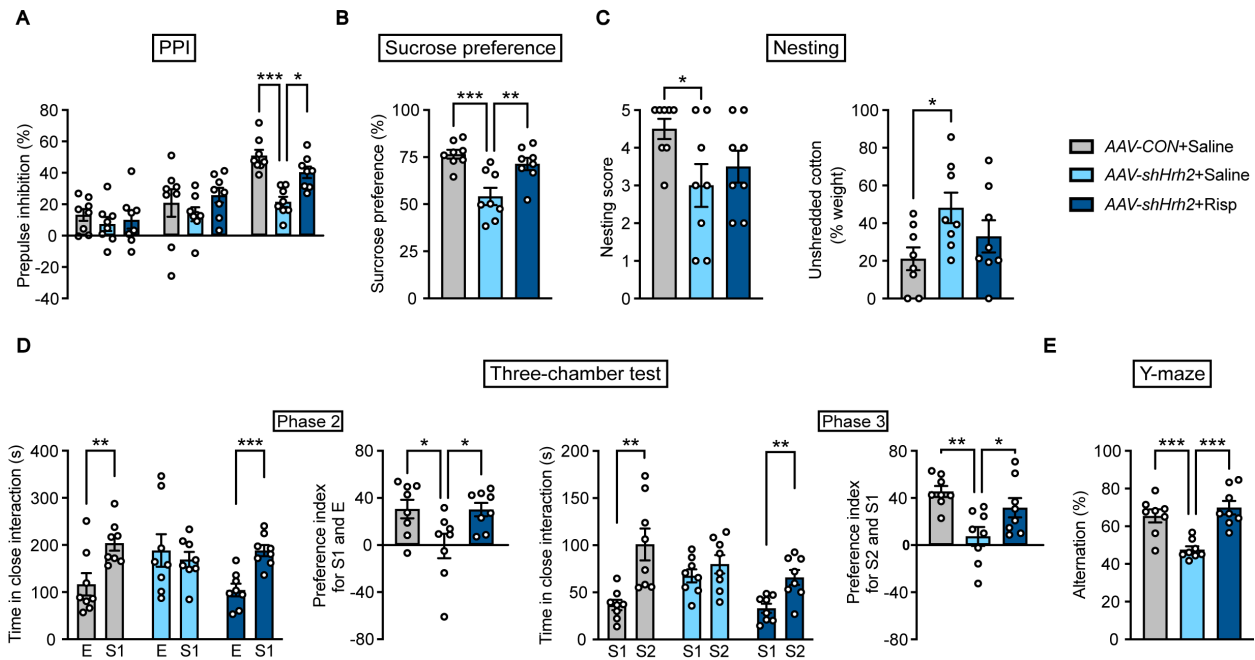

**Fig. S6. Antipsychotic agent risperidone rescues sensorimotor gating ability deficit, anhedonia-like behavior and social indifference manifested in *CaMKII $\alpha$ -Cre* mice injected in the mPFC with *AAV-FLEX-shHrh2-GFP* (*AAV-shHrh2*). (A-E) Sensorimotor gating, hedonic function, social behavior and cognitive behavior in *CaMKII $\alpha$ -Cre* mice injected in the mPFC with *AAV-FLEX-scramble shRNA-GFP* (*AAV-CON*) and *AAV-FLEX-shHrh2-GFP* (*AAV-shHrh2*) treated with risperidone. (A) Percentage of PPI of the auditory startle reflex under 74, 78, 82 dB prepulse intensities. (B) Test for sucrose preference within a 48 h period. (C) Nesting score and percentage of unshredded cotton in nest-building test. (D) Time in close interaction and preference index during phase 2 and phase 3 in three-chamber test. (E) Percentage of correct choice in Y-maze test. n=8 mice per group. \* $P \leq 0.05$ , \*\* $P \leq 0.01$ , \*\*\* $P \leq 0.001$ . See also Table. S2 for further statistical information.**

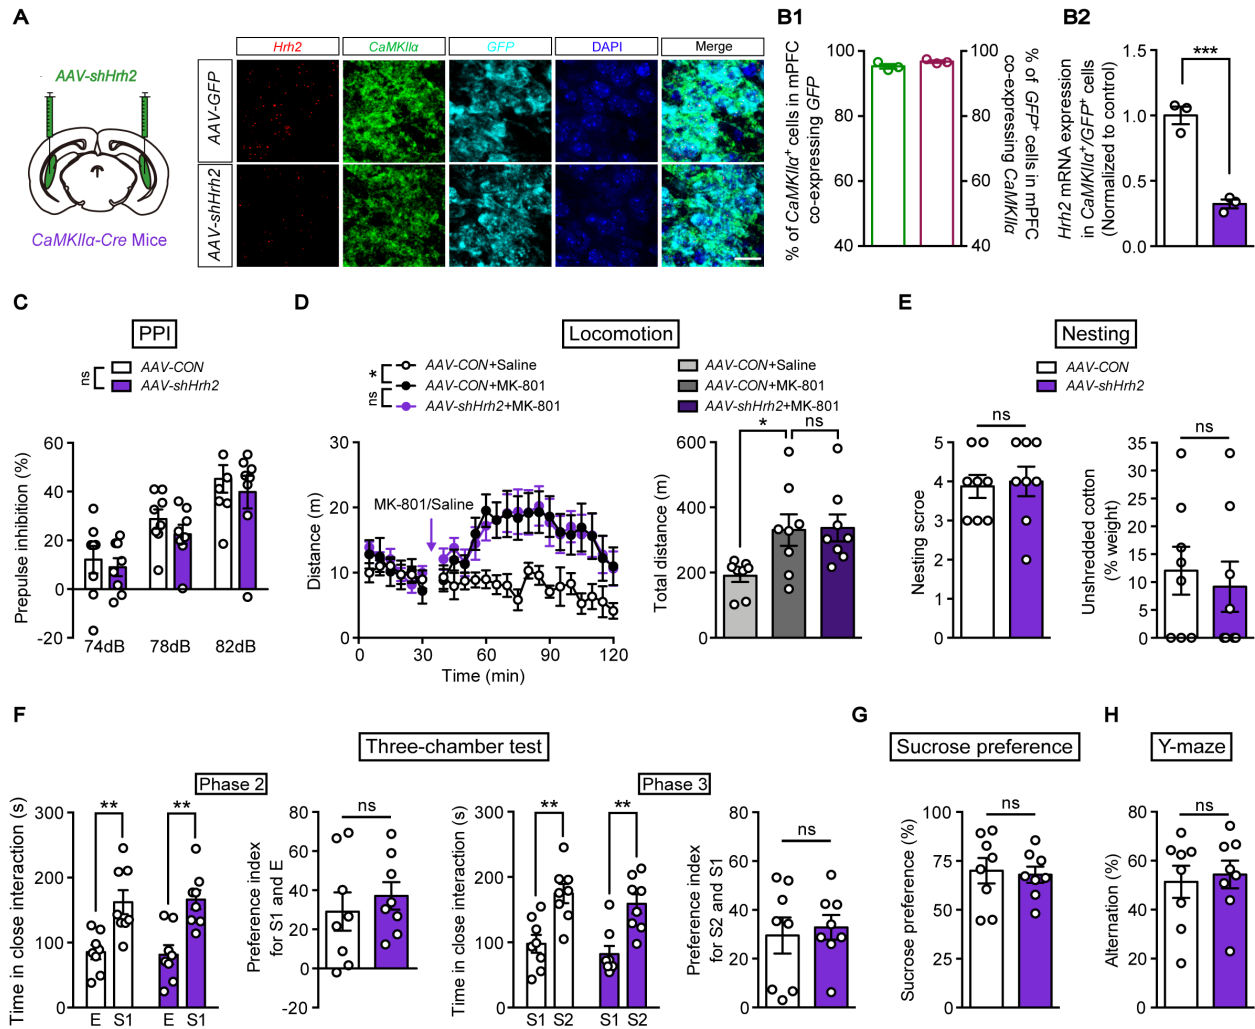

**Fig. S7. Knockdown of histamine H<sub>2</sub>R in hippocampus glutamatergic neurons does not induce schizophrenia-like behavior.** (A) Schematic diagram of the location of the injected virus and representative images of RNAscope *in situ* hybridization of *Hrh2*, *CaMKIIα*, and *GFP* mRNA. (B1) The percentage of *CaMKIIα*<sup>+</sup> glutamatergic neurons co-expressing *GFP* (left), and the percentage of *GFP*<sup>+</sup> cells co-expressing *CaMKIIα* (right). Scale bar, 20 μm. n=3 mice. (B2) *Hrh2* expression in *CaMKIIα*<sup>+</sup>/*GFP*<sup>+</sup> cells of *CaMKIIα*-Cre mice injected in the hippocampus with AAV-FLEX-scramble *shRNA*-*GFP* (AAV-CON) or AAV-FLEX-*shHrh2*-*GFP* (AAV-*shHrh2*) to knock down H<sub>2</sub>R. (C-H) Sensorimotor gating, susceptibility to MK-801-induced hyperactivity, social behavior, hedonic function, and cognitive behavior in *CaMKIIα*-Cre mice injected in the hippocampus with AAV-FLEX-scramble *shRNA*-*GFP* or AAV-FLEX-*shHrh2*-*GFP*. (C) Percentage of prepulse inhibition (PPI) of the auditory startle reflex across different prepulse intensities. (D) Locomotor activity assessed by the distance traveled in the open field every 5 min and the total distance traveled in the open field after administration of MK-801 or saline. (E) Nesting score and the percentage of the weight of cotton left unshredded in a nest-building test. (F) Time in close interaction and preference index during sociability testing (phase 2) when exposed to a stranger mouse S1 and during subsequent social novelty recognition testing (phase 3) when exposed to a new stranger mouse S2 together with S1. (G) Total consumption of water or sucrose and sucrose preference within a 48 h period. (H) Percentage of correct alternation in a Y-maze. n=8 mice for each group. \**P* ≤ 0.05, \*\**P* ≤ 0.01, \*\*\**P* ≤ 0.001, ns, not significant. See also the Table. S2 for further statistical information.



**Table. S1. Clinico-pathological information of schizophrenia patients and control subjects.**

|                  | Number | Gender | Age  | Braak stage | PMD (min) | BW (g) | CSF pH | Clinical diagnosis                                                                                                                                                                           | Sample source |
|------------------|--------|--------|------|-------------|-----------|--------|--------|----------------------------------------------------------------------------------------------------------------------------------------------------------------------------------------------|---------------|
| Schizophrenia    | 1      | M      | 61   | ND          | 165       | 1515   | ND     | Schizophrenia                                                                                                                                                                                | NBB           |
|                  | 2      | M      | 48   | ND          | 2460      | 1577   | ND     | Schizophrenia, hypochondriac and paranoid delusions, nervous, auditory hallucinations, paranoid hallucinative psychosis, paranoid and hypochondric delusions, anxious, isolated, selfneglect | NBB           |
|                  | 3      | F      | 92   | 3           | 455       | 877    | 6.30   | Schizophrenia, retarded, bizarre moodswings, unpredictable behavior disturbances, paranoia, manic-depressive episodes, comprise paranoia, bagatellisation, and negativism                    | NBB           |
|                  | 4      | M      | 67   | 1           | 345       | 1315   | 6.29   | Paranoid, anxious, passive, odorous hallucinations, suicide attempt, inactivity, diagnosed with paranoid anxious psychosis                                                                   | NBB           |
|                  | 5      | F      | 55   | 1           | 335       | 1180   | 6.62   | Paranoid, compulsive, depressed, insecure, diagnosed with catatonic schizophrenia                                                                                                            | NBB           |
|                  | 6      | F      | 58   | 1           | 150       | 1408   | 7.0    | Schizophrenia, hypertension, right breast cancer                                                                                                                                             | CBB           |
|                  | 7      | M      | 79   | 4           | 540       | 1164   | 7.0    | Schizophrenia, brain stem hemorrhage, herniation,                                                                                                                                            | CBB           |
|                  | 8      | F      | 57   | 1           | 540       | 1100   | 6.47   | Schizophrenia, hypertension, type 2 diabetes                                                                                                                                                 | CBB           |
|                  | 9      | M      | 27   | ND          | 455       | 1410   | 7.33   | Schizophrenia                                                                                                                                                                                | CBB           |
|                  | 10     | M      | 81   | ND          | 603       | 1280   | 6.41   | Schizophrenia                                                                                                                                                                                | CBB           |
| Mean             |        |        | 62.5 |             | 604.8     | 1283   | 6.678  |                                                                                                                                                                                              |               |
| SEM              |        |        | 5.85 |             | 211.8     | 66.34  | 0.14   |                                                                                                                                                                                              |               |
| Control          | 1      | M      | 62   | 0           | 395       | 1350   | 7.33   | Delirium, depressed mood, confused, visual hallucinations, delirious                                                                                                                         | NBB           |
|                  | 2      | M      | 69   | 1           | 1155      | 1337   | 6.40   | None                                                                                                                                                                                         | NBB           |
|                  | 3      | F      | 93   | 2           | 350       | 1145   | ?      | None                                                                                                                                                                                         | NBB           |
|                  | 4      | F      | 60   | 0           | 330       | 1215   | 7.07   | None                                                                                                                                                                                         | NBB           |
|                  | 5      | M      | 72   | 2           | 260       | 1385   | 6.45   | None                                                                                                                                                                                         | NBB           |
|                  | 6      | F      | 58   | 0           |           | 1310   | ND     | Multiple organ failure, cachexia                                                                                                                                                             | CBB           |
|                  | 7      | M      | 72   | 1           | 1020      | 1130   | ND     | none                                                                                                                                                                                         | CBB           |
|                  | 8      | F      | 57   | 0           | 519       | 1230   | 6.05   | Gastric malignancy, transient ischemic attack, meningeal malignancy (metastasis), hypertension                                                                                               | CBB           |
|                  | 9      | M      | 31   | ND          | 1190      | 1510   | 7.0    | Muscular dystrophy                                                                                                                                                                           | CBB           |
|                  | 10     | M      | 83   | ND          | 1480      | 1370   | 6.7    | Gum cancer, prostate cancer, chronic obstructive pulmonary disease                                                                                                                           | CBB           |
| Mean             |        |        | 65.7 |             | 744.3     | 1298   | 6.71   |                                                                                                                                                                                              |               |
| SEM              |        |        | 5.29 |             | 154.5     | 37.3   | 0.17   |                                                                                                                                                                                              |               |
| Significance (P) |        |        | 0.77 |             | 0.31      | 0.1    | 0.71   |                                                                                                                                                                                              |               |

Abbreviations: BW, brain weight; BZD, benzodiazepine; CSF, cerebrospinal fluid; F, female; Hal, haloperidol; Li, lithium; M, male; Mo, morphine; NBB, Netherlands Brain Bank; CBB, Chinese Brain Bank, ND, no data; None, no medication or no psychiatric symptoms; PMD, postmortem delay.
